# Supplementary material for: Heterotypic cell pair co-culturing on patterned microarrays
Source: Royal Society of Chemistry journal article supplement (doi:10.1039/c2lc40349h), 2012-01-01
Supplement: c2lc40349h.pdf [file c2lc40349h.pdf]

## Supplementary Material

### Heterotypic Cell Pair Co-culturing on Patterned Microarrays

Edward J. Felton, Craig C. Copeland, Christopher S. Chen, and Daniel H. Reich

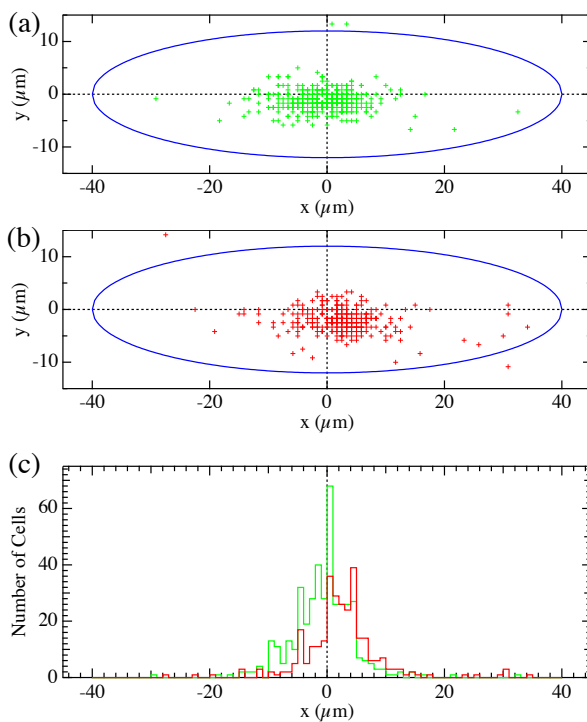

**Fig. S1** Locations of nuclei for traps with a single cell from an array of magnetically trapped NIH 3T3 cells, for (a) green and (b) orange-labelled cells. (c) Histograms of the location along the major axis of the traps for each type. Single cells are attracted to the traps' magnetic poles during sedimentation, but are able to migrate to the center of the trap if a second cell is not present.
